# Supplementary material
Source: publisher figshare collection journal article supplement (https://acs.figshare.com/ndownloader/files/18657872)
Supplement: Supplementary file 1 [file 18657872]

# Supporting Information

## Magnetizing Cellulose Fibres with $\text{CoFe}_2\text{O}_4$ Nanoparticles for Smart Wound Dressing for Healing Monitoring Capability

*Stephen Williams<sup>†,‡</sup>, Chigozie L. Okolie<sup>†</sup>, Jay Deshmukh<sup>†,‡</sup>, Lindsay  
Hawco<sup>†</sup>, James McNeil<sup>†,‡</sup>, Albert Collins Nganou Assonkeng<sup>†</sup>, Craig  
Bennett<sup>§</sup>, and Martin Mkandawire<sup>†\*</sup>*

<sup>†</sup> Department of Chemistry, Cape Breton University, Sydney, NS,  
B1P 6L2, Canada

<sup>‡</sup> Faculty of Engineering, Dalhousie University, Halifax, NS, B3H  
4R2, Canada

<sup>§</sup> Department of Physics, Acadia University, Wolfville, NS, B4P  
2R6, Canada

\* Corresponding Author: Email [martin\\_mkandawire@cbu.ca](mailto:martin_mkandawire@cbu.ca)

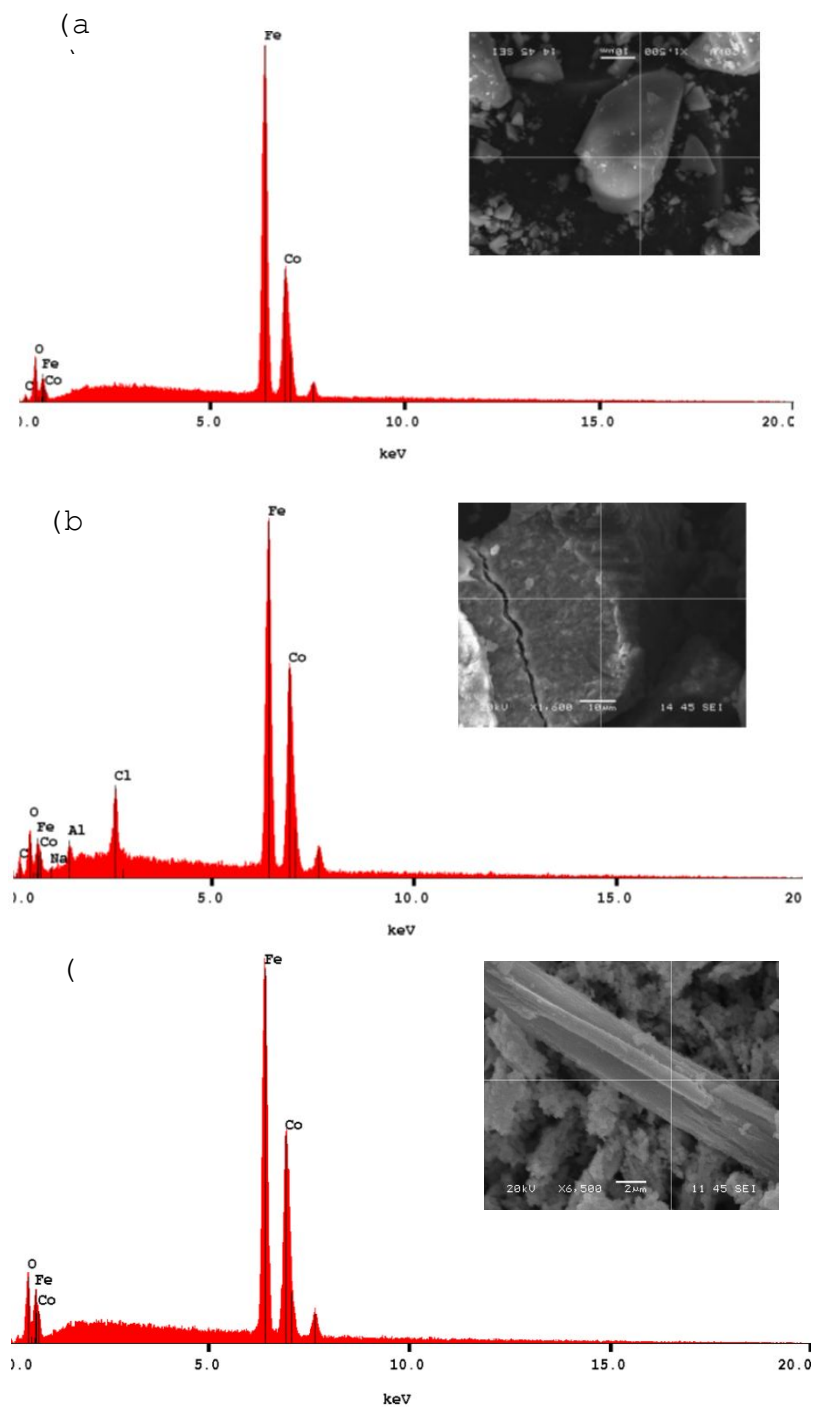

**Figure S1.** EDS spectra on spots in the inserted SEM image of the CoFe<sub>2</sub>O<sub>4</sub> nanomagnets: (a) produced with Protocol A, showing a quantification ratio of Fe: Co ~ 2:1; (b) produced with Protocol B nanoparticle showing a quantification ratio of Fe:Co ~1.5:1; and

(c) produced with Protocol C, showing a quantification ratio of  
Fe:Co ~1.8:1

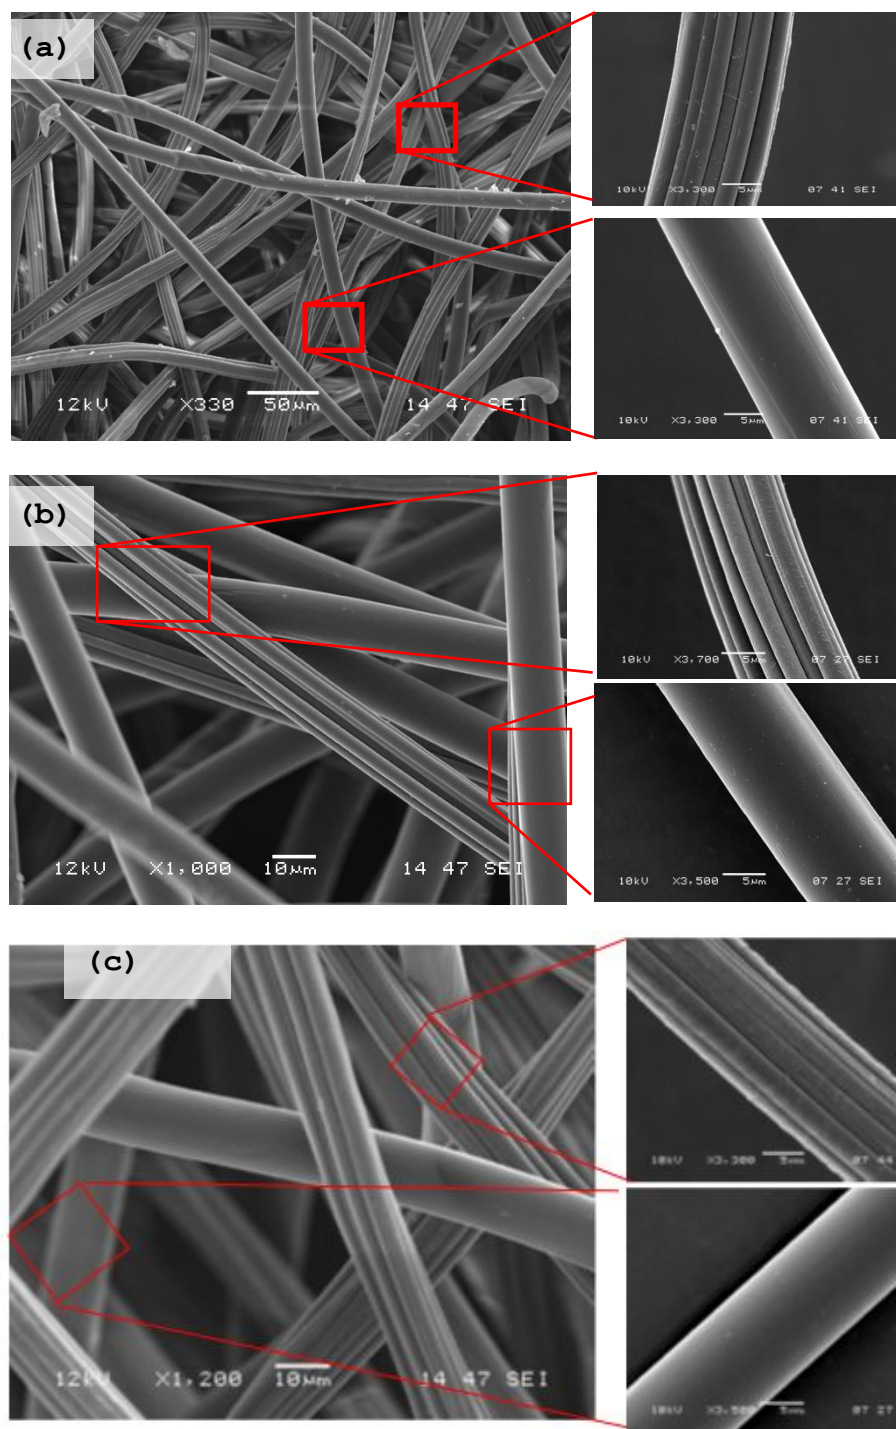

**Figure S2.** SEM images of cellulose fibres from Cite Curad wound dressing material (a) before functionalization and (b) after functionalization with branched polyethyleneimine b-PEI (c) after functionalized and rinsed with PEG, showing two types of fibre

arrangements in the cellulose and how the morphological and topographical differ before and after functionalization.

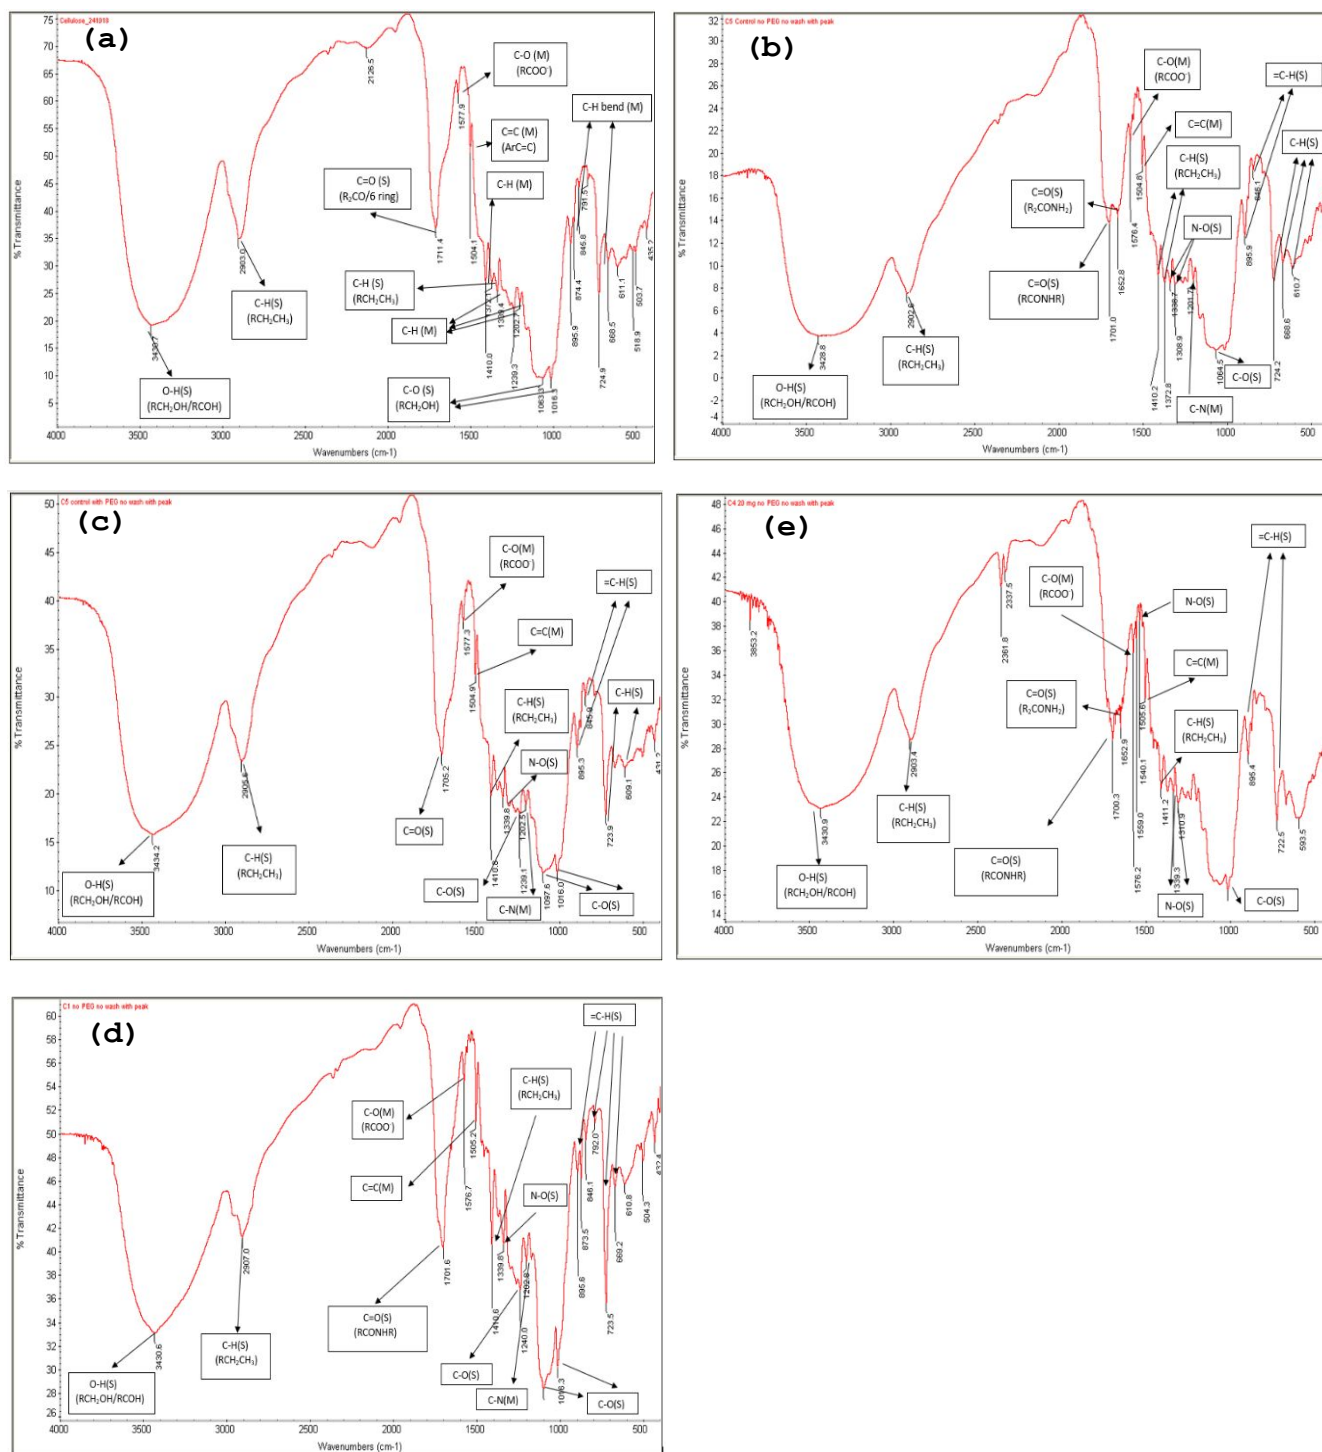

**Figure S3.** FTIR spectra labeled for type of vibration for (a) cellulose (b) functionalized cellulose (c) functionalized cellulose + PEG wash (d) functionalized cellulose + 5 mg/mL  $\text{CoFe}_2\text{O}_4$  nanoparticles (e) functionalized cellulose + 20 mg/mL  $\text{CoFe}_2\text{O}_4$

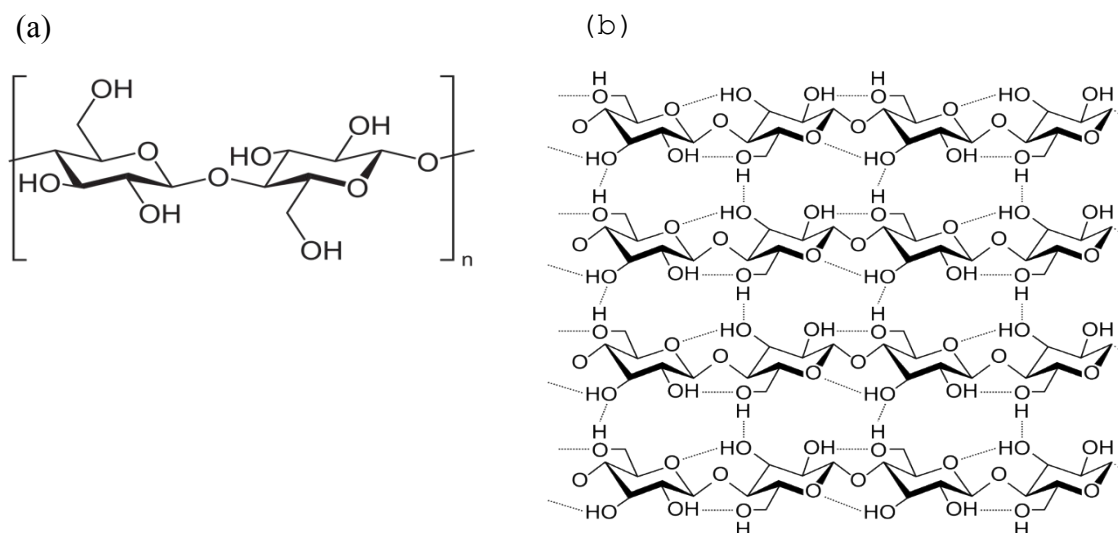

**Figure S4.** (a) a linear polymer of D-glucose units (two are shown) linked by  $\beta(1\rightarrow4)$ -glycosidic bonds (b) Quadruple strands of a linear polymer of D-glucose showing the hydrogen bonds between glucose strands in cellulose fibre..

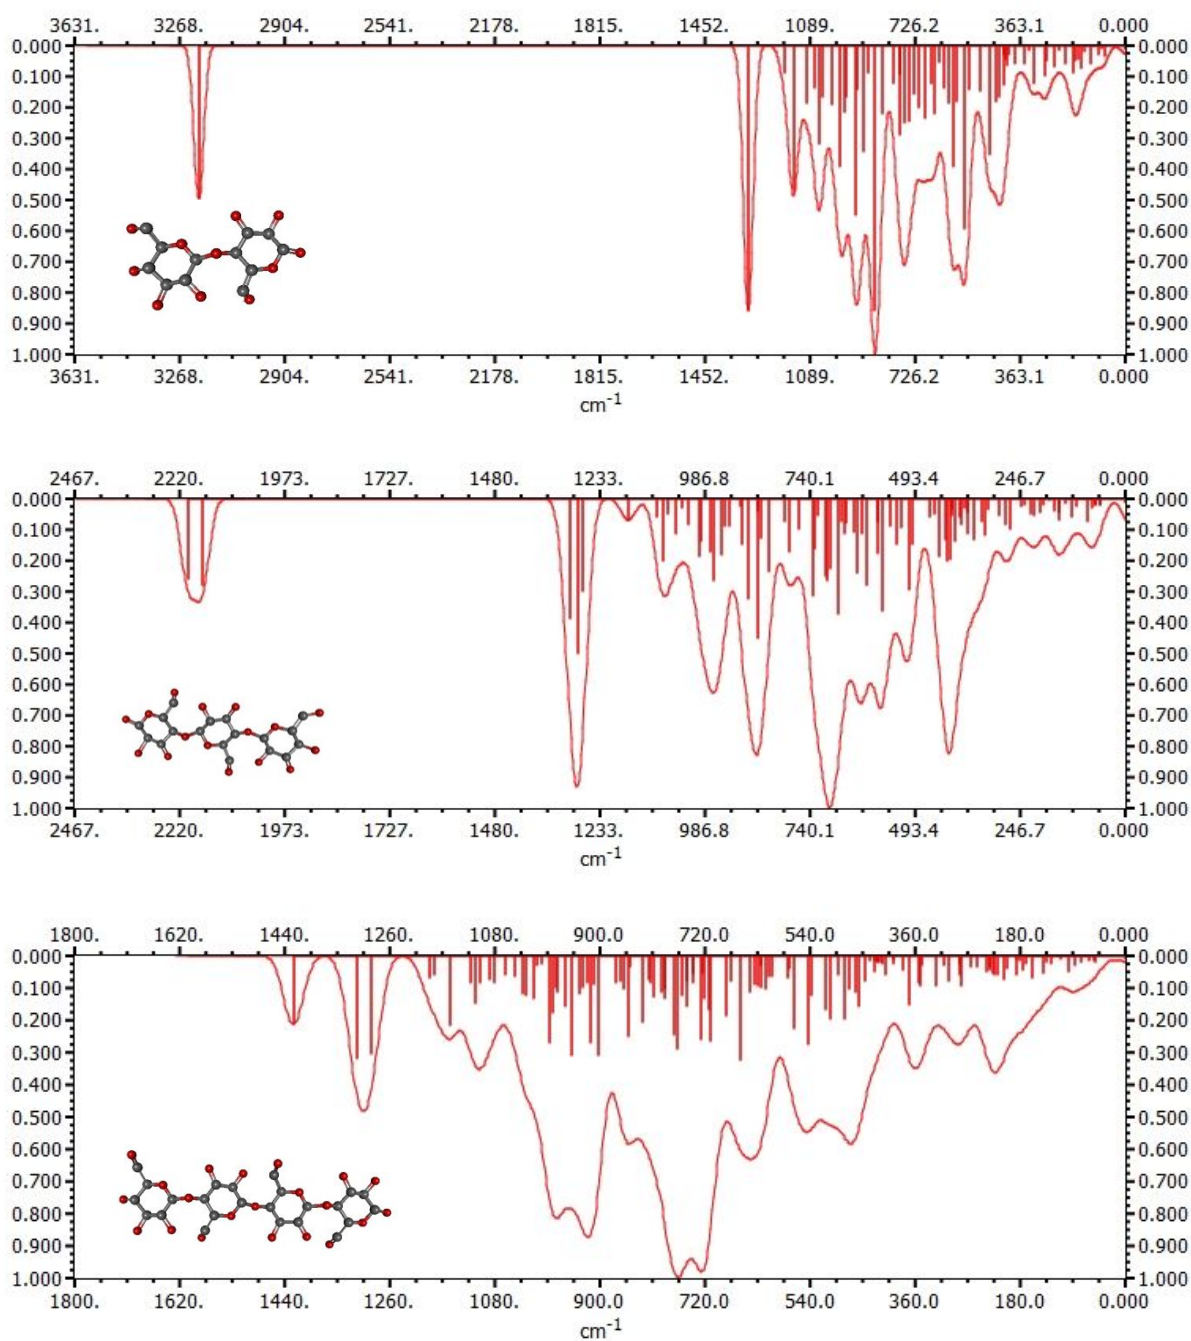

**Figure S5.** The IR models for single strand cellulose showing the change of the spectra pattern with increasing the number of rings.



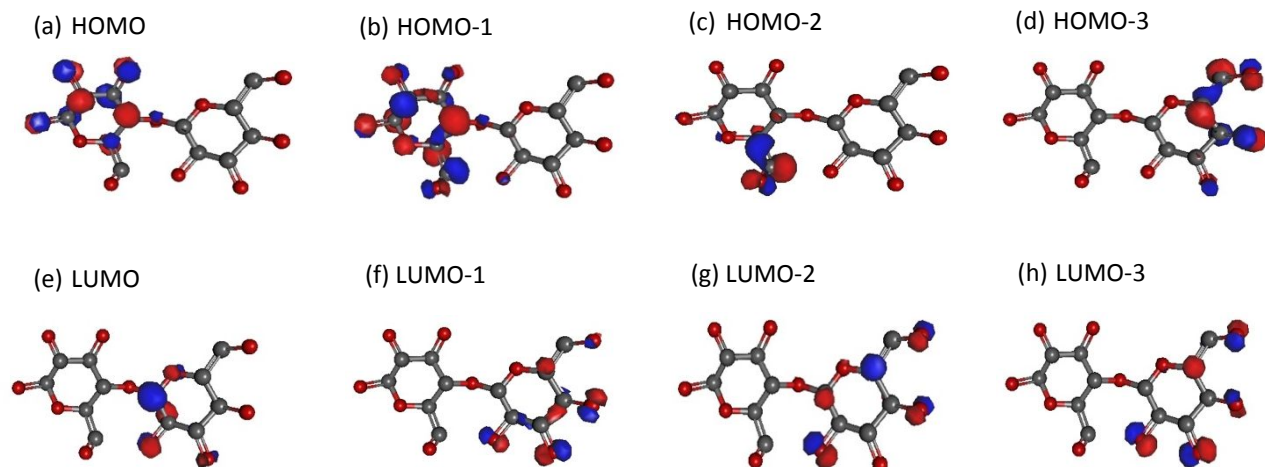

**Figure S6.** Thermochemical calculation of first excited state of cellubois (Alpha Orbitals), showing (a) the initial HOMO electronic orbital, (b) the 1<sup>st</sup> changes in HOMO electronic orbital, (c) the 2<sup>nd</sup> changes in HOMO electronic orbital, (d) the 3<sup>rd</sup> changes in HOMO electronic orbital (e) the initial LUMO orbital, (f) 1<sup>st</sup> change in the LUMO orbital, (g) 2<sup>nd</sup> change in the LUMO orbital, (h) 3<sup>rd</sup> change in the LUMO orbital
